# Supplementary material for: Transcriptome profiling and pathway analysis of genes expressed differentially in participants with or without a positive response to topiramate treatment for methamphetamine addiction
Source: PubMed Central journal article supplement (PMC4279796; doi:10.1186/s12920-014-0065-x), 2014-12-12

# Supplementary Figure 1A: Diagram illustration for sample selection and grouping of responders and non-responders to Topiramate treatment and Placebo for Week 8

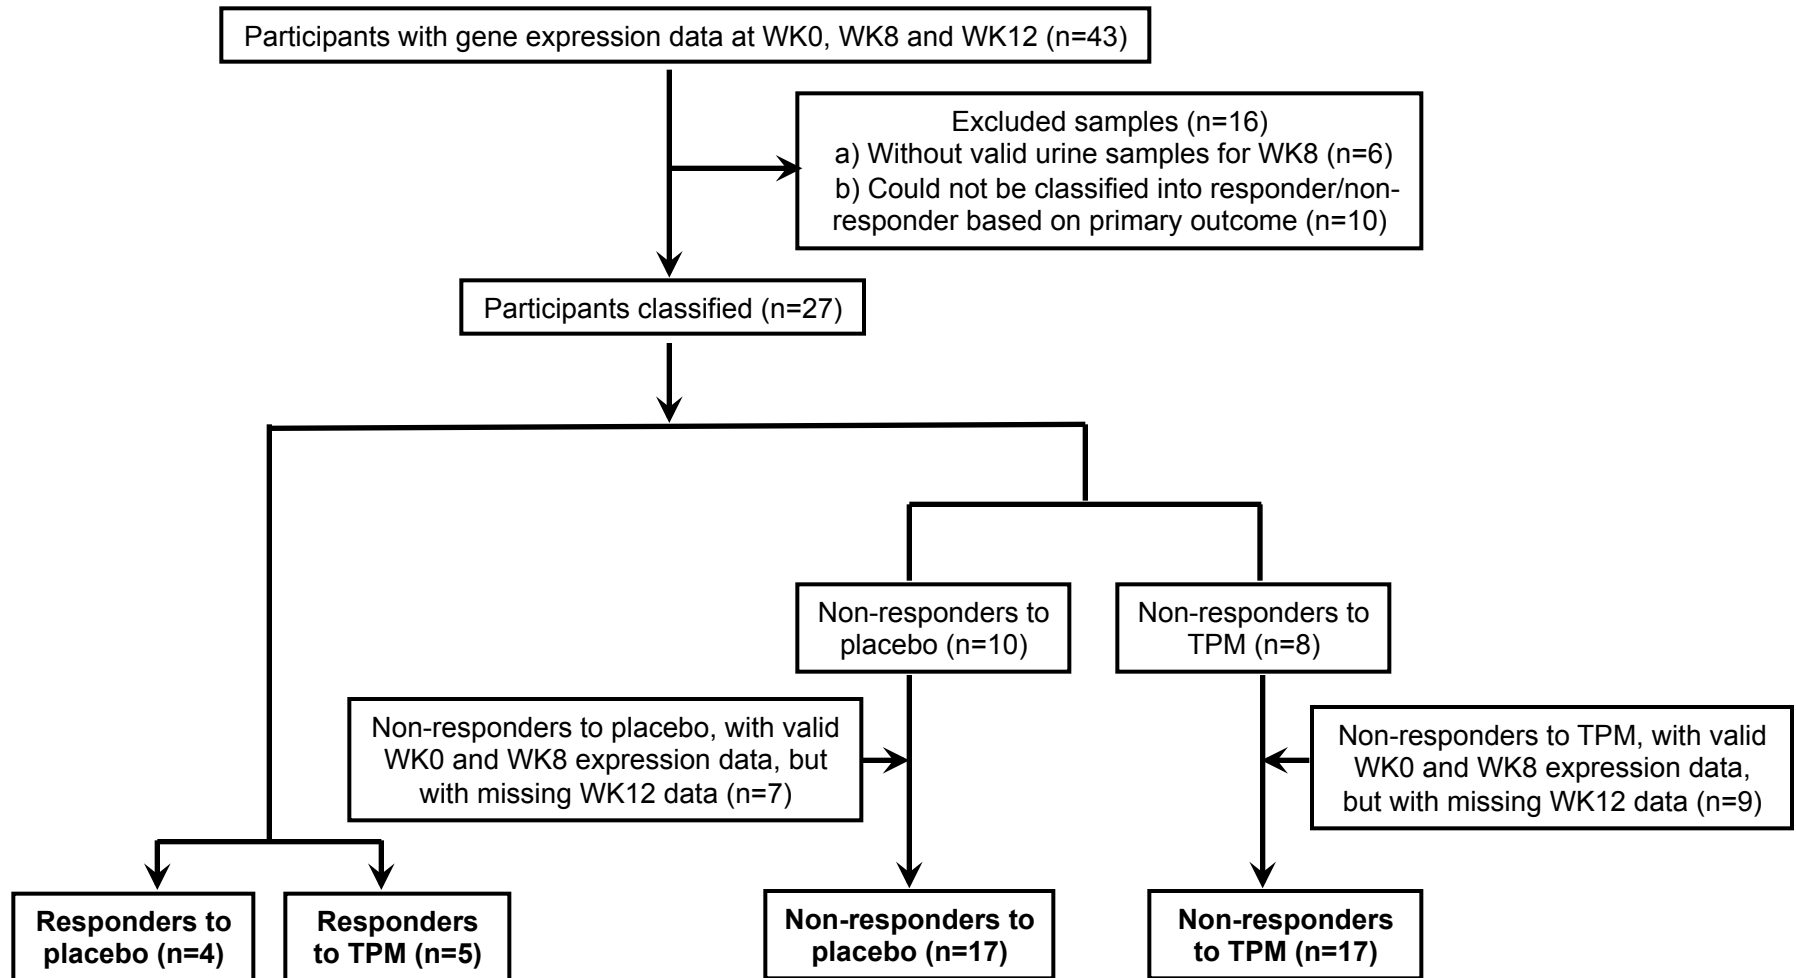

# Supplementary Figure 1B: Diagram illustration for sample selection and grouping of responders and non-responders to Topiramate treatment and Placebo for Week 12

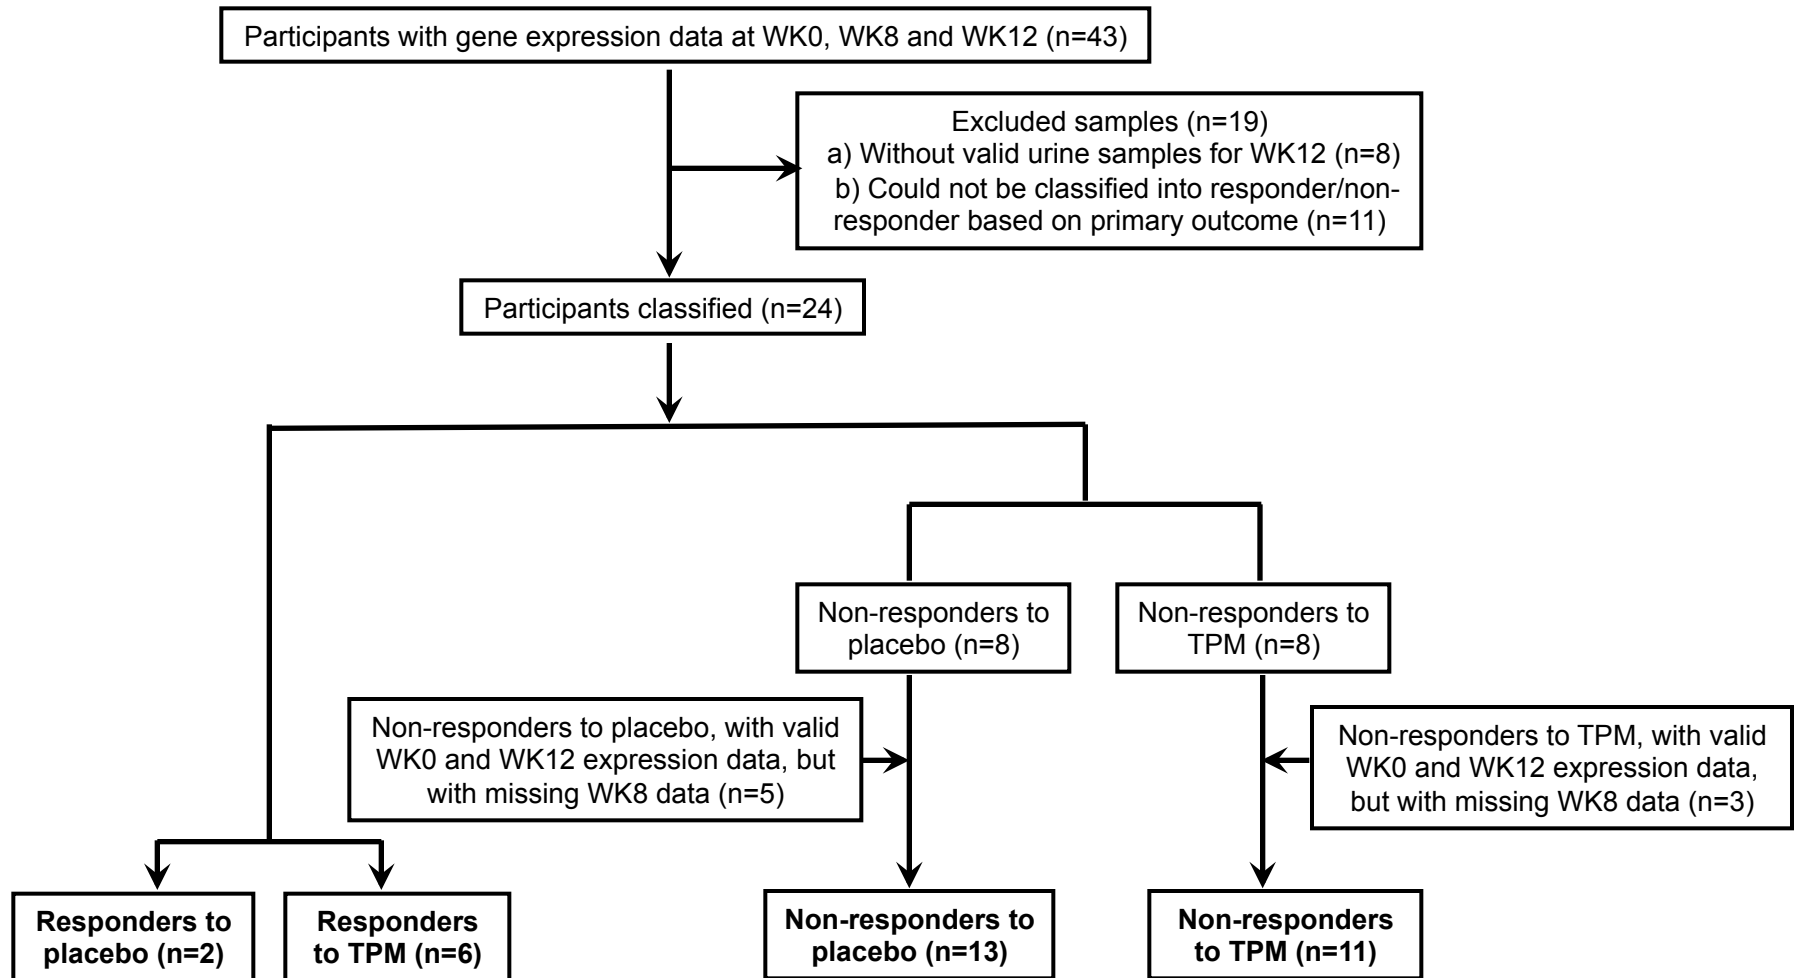

Supplement: 12920_2014_65_MOESM1_ESM.pdf [file 12920_2014_65_MOESM1_ESM.pdf]
